# Supplementary material for: Ni Oxidation State and Ligand Saturation Impact on the Capability of Octaazamacrocyclic Complexes to Bind and Reduce CO2
Source: MDPI journal article supplement (doi:10.3390/molecules26144139), 2021-07-07
Supplement: s1 [file s1]

**Table SI\_XYZ.** Total B3LYP/6-311G\* energies/enthalpies of different species studied including the xyz file names contained in this SI\_XYZ.zip.

|                                                                  | <b>E</b>     | <b>H</b>     | <b>NAME.xyz</b>  |
|------------------------------------------------------------------|--------------|--------------|------------------|
| <sup>3</sup> [NiL] <sup>2-</sup>                                 | -3250.503603 | -3250.142369 | 3NiL2_Red.xyz    |
| <sup>1</sup> [NiL] <sup>2-</sup>                                 | -3250.510626 | -3250.118574 | 1NiL2_Red.xyz    |
| <sup>2</sup> [NiL] <sup>-</sup>                                  | -3250.466015 | -3250.101912 | 2NiL1_Red.xyz    |
| <sup>1</sup> [NiL] <sup>0</sup>                                  | -3250.378540 | -3250.011645 | 1NiL0.xyz        |
| <sup>2</sup> [NiL] <sup>+</sup>                                  | -3250.186230 | -3249.819337 | 2NiL1_Ox.xyz     |
| <sup>1</sup> [NiL] <sup>2+</sup>                                 | -3249.948182 | -3249.580637 | 1NiL2_Ox.xyz     |
| <sup>1</sup> [NiLH] <sup>0</sup>                                 | -3258.616497 | -3258.079627 | 1NiLH0.xyz       |
| <sup>2</sup> [NiLH] <sup>+</sup>                                 | -3258.578456 | -3258.036079 | 2NiLH1.xyz       |
| <sup>2</sup> [NiLH <sub>C1</sub> ] <sup>+</sup>                  | -3258.574194 | -3258.031725 | 2NiLH1_C1.xyz    |
| <sup>2</sup> [NiLH <sub>C5</sub> ] <sup>+</sup>                  | -3258.577090 | -3258.034923 | 2NiLH1_C5.xyz    |
| <sup>1</sup> [NiLH] <sup>2+</sup>                                | -3258.432714 | -3257.886345 | 1NiLH2.xyz       |
| <sup>1</sup> [NiLH <sub>C1</sub> ] <sup>2+</sup>                 | -3258.428449 | -3257.881841 | 1NiLH2_C1.xyz    |
| <sup>1</sup> [NiLH <sub>C3</sub> ] <sup>2+</sup>                 | -3258.430081 | -3257.883263 | 1NiLH2_C3.xyz    |
| <sup>1</sup> [NiLH <sub>C5</sub> ] <sup>2+</sup>                 | -3258.430207 | -3257.882894 | 1NiLH2_C5.xyz    |
| <sup>1</sup> [NiLH <sub>C1C3</sub> ] <sup>2+</sup>               | -3258.422065 | -3257.875684 | 1NiLH2_C1_C3.xyz |
| <sup>3</sup> [NiL-CO <sub>2</sub> ] <sup>2-</sup>                | -3439.157621 | -3438.780621 | 3NiLCO22_Red.xyz |
| <sup>1</sup> [NiL-CO <sub>2</sub> ] <sup>2-</sup>                | -3439.157234 | -3438.778617 | 1NiLCO22_Red.xyz |
| <sup>2</sup> [NiL-CO <sub>2</sub> ] <sup>-</sup>                 | -3439.111696 | -3438.730981 | 2NiLCO21_Red.xyz |
| <sup>1</sup> [NiL-CO <sub>2</sub> ] <sup>0</sup>                 | -3439.023880 | -3438.640248 | 1NiLCO20.xyz     |
| <sup>2</sup> [NiL-CO <sub>2</sub> ] <sup>+</sup>                 | -3438.830920 | -3438.448238 | 2NiLCO21_Ox.xyz  |
| <sup>1</sup> [NiL-CO <sub>2</sub> ] <sup>2+</sup>                | -3438.592560 | -3438.208037 | 1NiLCO22_Ox.xyz  |
| <sup>1</sup> [NiLH-CO <sub>2</sub> ] <sup>0</sup>                | -3447.321361 | -3446.765337 | 1NiLHCO20.xyz    |
| <sup>2</sup> [NiLH-CO <sub>2</sub> ] <sup>+</sup>                | -3447.22514  | -3446.665791 | 2NiLHCO21.xyz    |
| <sup>2</sup> [NiLH <sub>C1</sub> -CO <sub>2</sub> ] <sup>+</sup> | -3447.221017 | -3446.661914 | 2NiLHCO21_C1.xyz |
| <sup>2</sup> [NiLH <sub>C5</sub> -CO <sub>2</sub> ] <sup>+</sup> | -3447.224161 | -3446.664701 | 2NiLHCO21_C5.xyz |
| <sup>1</sup> [NiL <sub>fr</sub> -CO <sub>2</sub> ] <sup>0</sup>  | -3438.976674 | -3438.542170 | 1NiLfrCO20.xyz   |
| <b>CO<sub>2</sub></b>                                            | -188.643673  | -188.628479  | CO2.xyz          |
