# Supplementary material for: Ni Oxidation State and Ligand Saturation Impact on the Capability of Octaazamacrocyclic Complexes to Bind and Reduce CO2
Source: MDPI journal article supplement (doi:10.3390/molecules26144139), 2021-07-07
Supplement: s1 [file s1]

# Ni oxidation state and ligand saturation impact on the capability of octaazamacrocyclic complexes to bind and reduce CO<sub>2</sub>

## Supplementary Materials

Barbora Vénosová,<sup>1</sup> Ingrid Jelemenská,<sup>1,2</sup> Jozef Kožíšek,<sup>1</sup> Peter Rapta,<sup>1</sup> Michal Zalibera,<sup>1</sup> Michal Novotný,<sup>3</sup> Vladimír B. Arion,<sup>4</sup> Lukáš Bučinský<sup>1,\*</sup>

<sup>1</sup>Institute of Physical Chemistry and Chemical Physics, Faculty of Chemical and Food Technology, Slovak University of Technology in Bratislava, Radlinského 9, SK-81237 Bratislava, Slovak Republic

<sup>2</sup>Department of Chemistry, Faculty of Natural Sciences, Constantine the Philosopher University in Nitra, 949 74 Nitra, Slovak Republic

<sup>3</sup>Department of Physics, Faculty of Science, University of Ostrava, 30.dubna 22, 701 03 Ostrava, Czech Republic

<sup>4</sup>University of Vienna, Institute of Inorganic Chemistry, Währinger Strasse 42, A-1090 Vienna, Austria

\*lukas.bucinsky@stuba.sk

## Content

|                                                                                                                                                                                                                                                               |    |
|---------------------------------------------------------------------------------------------------------------------------------------------------------------------------------------------------------------------------------------------------------------|----|
| <b>Table S1.</b> Total B3LYP/6-311G* energies/enthalpies of different species studied                                                                                                                                                                         | 2  |
| <b>Table S2.</b> Selected B3LYP/6-311G* bond distances (Å) and angles (°) of a) [NiL] and b) [NiLH]                                                                                                                                                           | 3  |
| <b>Table S3.</b> B3LYP/6-311G* MPA charges of a) [NiL] and b) [NiLH]                                                                                                                                                                                          | 4  |
| <b>Table S4.</b> B3LYP/6-311G* QTAIM charges of a) [NiL] and b) [NiLH]                                                                                                                                                                                        | 5  |
| <b>Table S5.</b> B3LYP/6-311G* QTAIM BCP characteristics of a) [NiL] and b) [NiLH]                                                                                                                                                                            | 6  |
| <b>Table S6.</b> B3LYP/6-311G* MPA of a) [NiL] and b) [NiLH] localized molecular orbitals on Ni                                                                                                                                                               | 8  |
| <b>Figure S1.</b> Comparison of geometries of complexes studied without and with CO <sub>2</sub>                                                                                                                                                              | 10 |
| <b>Figure S2.</b> Frontier orbitals of a) <sup>1</sup> [NiL] <sup>0</sup> and <sup>3</sup> [NiL] <sup>2-</sup> ; b) <sup>1</sup> [NiLH] <sup>0</sup> and <sup>2</sup> [NiLH] <sup>+</sup>                                                                     | 11 |
| <b>Figure S3.</b> Frontier orbitals of a) <sup>1</sup> [NiL-CO <sub>2</sub> ] <sup>0</sup> and <sup>3</sup> [NiL-CO <sub>2</sub> ] <sup>2-</sup> ; b) <sup>1</sup> [NiLH-CO <sub>2</sub> ] <sup>0</sup> and <sup>2</sup> [NiLH-CO <sub>2</sub> ] <sup>+</sup> | 13 |

**Table S1.** Total B3LYP/6-311G\* energies/enthalpies of different [NiL], [NiL-CO<sub>2</sub>], [NiLH], [NiLH-CO<sub>2</sub>] species studied and CO<sub>2</sub> (all values are in A.U.). [NiLH<sub>x</sub>] species denote geometries, where different R and S conformations were tested for the given atom(s) X (for atom labels see Figure 1 in the manuscript).

|                                                    | E            | H            |                                                                  | E            | H            |
|----------------------------------------------------|--------------|--------------|------------------------------------------------------------------|--------------|--------------|
| <sup>3</sup> [NiL] <sup>2-</sup>                   | -3250.503603 | -3250.142369 | <sup>3</sup> [NiL-CO <sub>2</sub> ] <sup>2-</sup>                | -3439.157621 | -3438.780621 |
| <sup>1</sup> [NiL] <sup>2-</sup>                   | -3250.510626 | -3250.118574 | <sup>1</sup> [NiL-CO <sub>2</sub> ] <sup>2-</sup>                | -3439.157234 | -3438.778617 |
| <sup>2</sup> [NiL] <sup>-</sup>                    | -3250.466015 | -3250.101912 | <sup>2</sup> [NiL-CO <sub>2</sub> ] <sup>-</sup>                 | -3439.111696 | -3438.730981 |
| <sup>1</sup> [NiL] <sup>0</sup>                    | -3250.378540 | -3250.011645 | <sup>1</sup> [NiL-CO <sub>2</sub> ] <sup>0</sup>                 | -3439.023880 | -3438.640248 |
| <sup>2</sup> [NiL] <sup>+</sup>                    | -3250.186230 | -3249.819337 | <sup>2</sup> [NiL-CO <sub>2</sub> ] <sup>+</sup>                 | -3438.830920 | -3438.448238 |
| <sup>1</sup> [NiL] <sup>2+</sup>                   | -3249.948182 | -3249.580637 | <sup>1</sup> [NiL-CO <sub>2</sub> ] <sup>2+</sup>                | -3438.592560 | -3438.208037 |
| <sup>1</sup> [NiLH] <sup>0</sup>                   | -3258.616497 | -3258.079627 | <sup>1</sup> [NiLH-CO <sub>2</sub> ] <sup>0</sup>                | -3447.321361 | -3446.765337 |
| <sup>2</sup> [NiLH] <sup>+</sup>                   | -3258.578456 | -3258.036079 | <sup>2</sup> [NiLH-CO <sub>2</sub> ] <sup>+</sup>                | -3447.22514  | -3446.665791 |
| <sup>2</sup> [NiLH <sub>Cl</sub> ] <sup>+</sup>    | -3258.574194 | -3258.031725 | <sup>2</sup> [NiLH <sub>Cl</sub> -CO <sub>2</sub> ] <sup>+</sup> | -3447.221017 | -3446.661914 |
| <sup>2</sup> [NiLH <sub>C5</sub> ] <sup>+</sup>    | -3258.577090 | -3258.034923 | <sup>2</sup> [NiLH <sub>C5</sub> -CO <sub>2</sub> ] <sup>+</sup> | -3447.224161 | -3446.664701 |
| <sup>1</sup> [NiLH] <sup>2+</sup>                  | -3258.432714 | -3257.886345 |                                                                  | -            | -            |
| <sup>1</sup> [NiLH <sub>Cl</sub> ] <sup>2+</sup>   | -3258.428449 | -3257.881841 |                                                                  |              |              |
| <sup>1</sup> [NiLH <sub>C3</sub> ] <sup>2+</sup>   | -3258.430081 | -3257.883263 |                                                                  |              |              |
| <sup>1</sup> [NiLH <sub>C5</sub> ] <sup>2+</sup>   | -3258.430207 | -3257.882894 |                                                                  |              |              |
| <sup>1</sup> [NiLH <sub>ClC3</sub> ] <sup>2+</sup> | -3258.422065 | -3257.875684 |                                                                  |              |              |
| CO <sub>2</sub>                                    | -188.643673  | -188.628479  | <sup>1</sup> [NiL <sub>fr</sub> -CO <sub>2</sub> ] <sup>0</sup>  | -3438.976674 | -3438.542170 |

**Table S2a.** Selected B3LYP/6-311G\* bond distances (Å) and angles (°) of [NiL] complexes (according to the notation in Figure 1).

| Distances                    | <sup>3</sup> [NiL] <sup>2-</sup> | <sup>3</sup> [NiL-CO <sub>2</sub> ] <sup>2-</sup> | <sup>1</sup> [NiL] <sup>2-</sup> | <sup>2</sup> [NiL] <sup>-</sup> | <sup>1</sup> [NiL] <sup>0</sup> | <sup>1</sup> [NiL-CO <sub>2</sub> ] <sup>0</sup> | <sup>1</sup> [NiL <sub>n</sub> -CO <sub>2</sub> ] <sup>0</sup> | <sup>2</sup> [NiL] <sup>+</sup> | <sup>1</sup> [NiL] <sup>2+</sup> |
|------------------------------|----------------------------------|---------------------------------------------------|----------------------------------|---------------------------------|---------------------------------|--------------------------------------------------|----------------------------------------------------------------|---------------------------------|----------------------------------|
| Ni-N(1)                      | 2.01                             | 1.99                                              | 1.92                             | 1.91                            | 1.90                            | 1.90                                             | 1.89                                                           | 1.91                            | 1.92                             |
| Ni-N(3)                      | 1.97                             | 2.05                                              | 1.90                             | 1.91                            | 1.91                            | 1.91                                             | 1.95                                                           | 1.91                            | 1.90                             |
| Ni-N(5)                      | 1.94                             | 1.95                                              | 1.84                             | 1.85                            | 1.83                            | 1.83                                             | 1.84                                                           | 1.83                            | 1.84                             |
| Ni-N(7)                      | 1.92                             | 1.95                                              | 1.87                             | 1.85                            | 1.86                            | 1.86                                             | 1.89                                                           | 1.86                            | 1.87                             |
| <b>Angles</b>                |                                  |                                                   |                                  |                                 |                                 |                                                  |                                                                |                                 |                                  |
| N(1)NiN(3)                   | 106.70                           | 106.25                                            | 102.95                           | 102.37                          | 102.74                          | 102.74                                           | 102.96                                                         | 102.87                          | 102.95                           |
| N(3)NiN(5)                   | 80.67                            | 78.96                                             | 82.75                            | 82.41                           | 82.10                           | 82.10                                            | 81.19                                                          | 82.42                           | 82.75                            |
| N(5)NiN(7)                   | 91.08                            | 91.69                                             | 92.60                            | 91.85                           | 92.18                           | 92.18                                            | 92.49                                                          | 92.56                           | 92.60                            |
| N(7)NiN(1)                   | 81.38                            | 80.89                                             | 81.94                            | 83.30                           | 83.15                           | 83.15                                            | 82.68                                                          | 82.48                           | 81.94                            |
| N(1)NiN(5)                   | 168.53                           | 170.39                                            | 169.35                           | 171.17                          | 171.67                          | 171.67                                           | 175.00                                                         | 170.92                          | 169.35                           |
| N(3)NiN(7)                   | 171.73                           | 160.68                                            | 174.97                           | 174.25                          | 174.02                          | 174.02                                           | 160.48                                                         | 174.22                          | 174.97                           |
| NiN(1)N(2)                   | 132.28                           | 129.05                                            | 132.44                           | 132.89                          | 133.20                          | 133.20                                           | 130.18                                                         | 132.41                          | 132.44                           |
| NiN(3)N(4)                   | 114.30                           | 112.99                                            | 112.99                           | 113.93                          | 113.94                          | 113.94                                           | 113.13                                                         | 113.57                          | 112.99                           |
| NiN(5)N(6)                   | 130.56                           | 129.69                                            | 131.03                           | 131.72                          | 131.26                          | 131.26                                           | 130.24                                                         | 131.05                          | 131.03                           |
| NiN(7)N(8)                   | 116.17                           | 115.34                                            | 117.02                           | 115.97                          | 115.77                          | 115.77                                           | 115.14                                                         | 116.42                          | 117.02                           |
| NiN(3)C(3)                   | 124.21                           | 124.91                                            | 129.67                           | 129.18                          | 129.26                          | 129.26                                           | 129.31                                                         | 129.48                          | 129.67                           |
| NiN(7)C(6)                   | 126.34                           | 126.49                                            | 126.41                           | 127.20                          | 127.46                          | 127.46                                           | 126.95                                                         | 126.94                          | 126.41                           |
| CO <sub>2</sub> <sup>a</sup> | -                                | 137.62                                            | -                                | -                               | -                               | 179.53                                           | 145.24                                                         | -                               | -                                |
| NiCO <sup>b,c</sup>          | -                                | 111.00                                            | -                                | -                               | -                               | 87.90                                            | 105.56                                                         | -                               | -                                |
| N(3)NiC <sup>b</sup>         | -                                | 94.83                                             | -                                | -                               | -                               | 82.70                                            | 99.51                                                          | -                               | -                                |
| N(7)NiC <sup>b</sup>         | -                                | 102.87                                            | -                                | -                               | -                               | -                                                | 99.51                                                          | -                               | -                                |

<sup>a</sup> O-C-O angle in CO<sub>2</sub>; <sup>b</sup> C denotes the carbon in CO<sub>2</sub>; <sup>c</sup> O denotes one of the oxygens in CO<sub>2</sub>

**Table S2b.** Selected B3LYP/6-311G\* bond distances (Å) and angles (°) of [NiLH] (according to the notation in Figure 1).

| Distances                    | <sup>1</sup> [NiLH] <sup>0</sup> | <sup>1</sup> [NiLH-CO <sub>2</sub> ] <sup>0</sup> | <sup>2</sup> [NiLH] <sup>+</sup> | <sup>2</sup> [NiLH-CO <sub>2</sub> ] <sup>+</sup> | <sup>1</sup> [NiLH] <sup>2+</sup> |
|------------------------------|----------------------------------|---------------------------------------------------|----------------------------------|---------------------------------------------------|-----------------------------------|
| Ni-N(1)                      | 2.96                             | 3.08                                              | 2.10                             | 2.11                                              | 1.95                              |
| Ni-N(3)                      | 1.91                             | 2.00                                              | 2.06                             | 2.09                                              | 1.95                              |
| Ni-N(5)                      | 2.77                             | 2.22                                              | 2.06                             | 2.06                                              | 1.92                              |
| Ni-N(7)                      | 1.88                             | 2.01                                              | 2.05                             | 2.08                                              | 1.96                              |
| <b>Angles</b>                |                                  |                                                   |                                  |                                                   |                                   |
| N(1)NiN(3)                   | 114.30                           | 106.85                                            | 100.59                           | 101.08                                            | 97.28                             |
| N(3)NiN(5)                   | 73.47                            | 80.03                                             | 84.14                            | 83.21                                             | 86.89                             |
| N(5)NiN(7)                   | 100.24                           | 101.33                                            | 89.57                            | 89.97                                             | 89.25                             |
| N(7)NiN(1)                   | 71.77                            | 70.55                                             | 85.14                            | 83.38                                             | 86.50                             |
| N(1)NiN(5)                   | 172.00                           | 149.29                                            | 172.87                           | 167.37                                            | 175.01                            |
| N(3)NiN(7)                   | 168.09                           | 170.22                                            | 171.30                           | 168.17                                            | 175.84                            |
| NiN(1)N(2)                   | 107.62                           | 113.70                                            | 110.77                           | 109.97                                            | 107.80                            |
| NiN(3)N(4)                   | 116.42                           | 108.66                                            | 103.22                           | 103.93                                            | 109.90                            |
| NiN(5)N(6)                   | 94.11                            | 119.89                                            | 108.97                           | 110.76                                            | 111.79                            |
| NiN(7)N(8)                   | 119.95                           | 118.78                                            | 108.19                           | 108.96                                            | 109.69                            |
| NiN(3)C(3)                   | 119.55                           | 120.72                                            | 113.29                           | 114.18                                            | 117.35                            |
| NiN(7)C(6)                   | 114.16                           | 116.28                                            | 114.85                           | 116.65                                            | 114.23                            |
| CO <sub>2</sub> <sup>a</sup> | -                                | 129.12                                            | -                                | 146.63                                            | -                                 |
| NiCO <sup>b,c</sup>          | -                                | 118.53                                            | -                                | 105.26                                            | -                                 |
| N(3)NiC <sup>b</sup>         | -                                | 94.55                                             | -                                | 93.88                                             | -                                 |
| N(7)NiC <sup>b</sup>         | -                                | 94.11                                             | -                                | 96.30                                             | -                                 |

<sup>a</sup> O-C-O angle in CO<sub>2</sub>; <sup>b</sup> C denotes the carbon in CO<sub>2</sub>; <sup>c</sup> O denotes one of the oxygens in CO<sub>2</sub>

**Table S3a.** B3LYP/6-311G\* MPA charges of [NiL] complexes.

| Atoms | <sup>3</sup> [NiL] <sup>2-</sup> | <sup>3</sup> [NiL-CO <sub>2</sub> ] <sup>2-</sup> | <sup>1</sup> [NiL] <sup>2-</sup> | <sup>2</sup> [NiL] <sup>2-</sup> | <sup>1</sup> [NiL] <sup>0</sup> | <sup>1</sup> [NiL-CO <sub>2</sub> ] <sup>0</sup> | <sup>1</sup> [NiL <sub>tr</sub> -CO <sub>2</sub> ] <sup>0</sup> | <sup>2</sup> [NiL] <sup>+</sup> | <sup>1</sup> [NiL] <sup>2+</sup> |
|-------|----------------------------------|---------------------------------------------------|----------------------------------|----------------------------------|---------------------------------|--------------------------------------------------|-----------------------------------------------------------------|---------------------------------|----------------------------------|
| Ni    | 0.730                            | 1.059                                             | 0.887                            | 0.958                            | 1.003                           | 1.002                                            | 1.102                                                           | 1.047                           | 1.096                            |
| S(1)  | -0.022                           | 0.006                                             | -0.010                           | 0.057                            | 0.126                           | 0.127                                            | 0.152                                                           | 0.231                           | 0.339                            |
| S(2)  | -0.034                           | 0.001                                             | -0.020                           | 0.064                            | 0.146                           | 0.147                                            | 0.171                                                           | 0.219                           | 0.290                            |
| N(1)  | -0.522                           | -0.521                                            | -0.556                           | -0.528                           | -0.465                          | -0.464                                           | -0.442                                                          | -0.444                          | -0.388                           |
| N(2)  | -0.509                           | -0.516                                            | -0.525                           | -0.531                           | -0.528                          | -0.529                                           | -0.533                                                          | -0.477                          | -0.450                           |
| N(3)  | -0.478                           | -0.469                                            | -0.458                           | -0.482                           | -0.494                          | -0.494                                           | -0.48                                                           | -0.419                          | -0.340                           |
| N(4)  | -0.428                           | -0.402                                            | -0.436                           | -0.434                           | -0.433                          | -0.432                                           | -0.412                                                          | -0.437                          | -0.439                           |
| N(5)  | -0.358                           | -0.345                                            | -0.355                           | -0.330                           | -0.300                          | -0.297                                           | -0.274                                                          | -0.241                          | -0.193                           |
| N(6)  | -0.323                           | -0.311                                            | -0.372                           | -0.291                           | -0.212                          | -0.211                                           | -0.196                                                          | -0.177                          | -0.117                           |
| N(7)  | -0.310                           | -0.301                                            | -0.279                           | -0.290                           | -0.299                          | -0.296                                           | -0.278                                                          | -0.210                          | -0.122                           |
| N(8)  | -0.231                           | -0.216                                            | -0.232                           | -0.216                           | -0.203                          | -0.204                                           | -0.204                                                          | -0.189                          | -0.175                           |
| C(1)  | 0.107                            | 0.114                                             | 0.109                            | 0.121                            | 0.150                           | 0.151                                            | 0.154                                                           | -0.725                          | -0.714                           |
| C(2)  | -0.586                           | -0.610                                            | -0.595                           | -0.615                           | -0.627                          | -0.629                                           | -0.626                                                          | -0.636                          | -0.643                           |
| C(3)  | 0.207                            | 0.252                                             | 0.225                            | 0.238                            | 0.257                           | 0.257                                            | 0.269                                                           | 0.279                           | 0.296                            |
| C(4)  | 0.273                            | 0.323                                             | 0.278                            | 0.339                            | 0.409                           | 0.410                                            | 0.422                                                           | 0.430                           | 0.452                            |
| C(5)  | 0.228                            | 0.230                                             | 0.199                            | 0.259                            | 0.295                           | 0.291                                            | 0.283                                                           | 0.294                           | 0.287                            |
| C(6)  | 0.211                            | 0.215                                             | 0.183                            | 0.244                            | 0.289                           | 0.286                                            | 0.289                                                           | 0.306                           | 0.313                            |
| C(7)  | 0.205                            | 0.239                                             | 0.175                            | 0.256                            | 0.319                           | 0.317                                            | 0.344                                                           | 0.344                           | 0.363                            |
| O(1)  |                                  | -0.417                                            |                                  |                                  |                                 | -0.260                                           | -0.324                                                          |                                 |                                  |
| C     |                                  | 0.109                                             |                                  |                                  |                                 | 0.515                                            | 0.216                                                           |                                 |                                  |
| O(2)  |                                  | -0.408                                            |                                  |                                  |                                 | -0.260                                           | -0.321                                                          |                                 |                                  |

**Table S3b.** B3LYP/6-311G\* MPA charges of [NiLH]complexes.

| Atoms | <sup>1</sup> [NiLH] <sup>0</sup> | <sup>1</sup> [NiLH-CO <sub>2</sub> ] <sup>0</sup> | <sup>2</sup> [NiLH] <sup>+</sup> | <sup>2</sup> [NiLH-CO <sub>2</sub> ] <sup>+</sup> | <sup>1</sup> [NiLH] <sup>2+</sup> | CO <sub>2</sub> |
|-------|----------------------------------|---------------------------------------------------|----------------------------------|---------------------------------------------------|-----------------------------------|-----------------|
| Ni    | 0.038                            | 0.840                                             | 0.761                            | 1.148                                             | 1.049                             |                 |
| S(1)  | 0.001                            | 0.033                                             | 0.096                            | 0.123                                             | 0.166                             |                 |
| S(2)  | -0.004                           | 0.056                                             | 0.096                            | 0.125                                             | 0.177                             |                 |
| N(1)  | -0.582                           | -0.629                                            | -0.591                           | -0.613                                            | -0.608                            |                 |
| N(2)  | -0.419                           | -0.551                                            | -0.565                           | -0.579                                            | -0.591                            |                 |
| N(3)  | -0.569                           | -0.408                                            | -0.580                           | -0.602                                            | -0.604                            |                 |
| N(4)  | -0.408                           | -0.604                                            | -0.616                           | -0.639                                            | -0.629                            |                 |
| N(5)  | -0.453                           | -0.420                                            | -0.420                           | -0.416                                            | -0.401                            |                 |
| N(6)  | -0.399                           | -0.427                                            | -0.389                           | -0.387                                            | -0.358                            |                 |
| N(7)  | -0.405                           | -0.396                                            | -0.378                           | -0.364                                            | -0.351                            |                 |
| N(8)  | -0.613                           | -0.628                                            | -0.667                           | -0.665                                            | -0.680                            |                 |
| C(1)  | -0.673                           | -0.650                                            | -0.125                           | -0.129                                            | -0.151                            |                 |
| C(2)  | -0.060                           | -0.107                                            | -0.423                           | -0.421                                            | -0.411                            |                 |
| C(3)  | -0.450                           | -0.445                                            | -0.633                           | -0.631                                            | -0.624                            |                 |
| C(4)  | -0.588                           | -0.639                                            | -0.441                           | -0.446                                            | -0.427                            |                 |
| C(5)  | -0.408                           | -0.432                                            | -0.776                           | -0.781                                            | -0.786                            |                 |
| C(6)  | -0.780                           | -0.785                                            | -0.085                           | -0.088                                            | -0.111                            |                 |
| C(7)  | -0.063                           | -0.061                                            | -0.021                           | -0.034                                            | -0.059                            |                 |
| O(1)  |                                  | -0.478                                            |                                  | -0.328                                            |                                   | -0.254          |
| C     |                                  | 0.033                                             |                                  | 0.189                                             |                                   | 0.501           |
| O(2)  |                                  | -0.482                                            |                                  | -0.327                                            |                                   | -0.254          |

**Table S4a.** B3LYP/6-311G\* QTAIM charges of [NiL] complexes.

| Atoms | <sup>3</sup> [NiL] <sup>2-</sup> | <sup>3</sup> [NiL-CO <sub>2</sub> ] <sup>2-</sup> | <sup>1</sup> [NiL] <sup>2-</sup> | <sup>2</sup> [NiL] <sup>-</sup> | <sup>1</sup> [NiL] <sup>0</sup> | <sup>1</sup> [NiL-CO <sub>2</sub> ] <sup>0</sup> | <sup>1</sup> [NiL <sub>tr</sub> -CO <sub>2</sub> ] <sup>0</sup> | <sup>2</sup> [NiL] <sup>+</sup> | <sup>1</sup> [NiL] <sup>2+</sup> |
|-------|----------------------------------|---------------------------------------------------|----------------------------------|---------------------------------|---------------------------------|--------------------------------------------------|-----------------------------------------------------------------|---------------------------------|----------------------------------|
| Ni    | 0.741                            | 0.943                                             | 0.89                             | 0.942                           | 0.967                           | 0.965                                            | 1.000                                                           | 0.995                           | 1.029                            |
| S(1)  | -0.023                           | -0.027                                            | -0.04                            | 0.026                           | 0.094                           | 0.095                                            | 0.120                                                           | 0.203                           | 0.321                            |
| S(2)  | -0.011                           | -0.020                                            | -0.03                            | 0.045                           | 0.118                           | 0.120                                            | 0.141                                                           | 0.192                           | 0.270                            |
| N(1)  | -0.817                           | -0.759                                            | -0.74                            | -0.761                          | -0.772                          | -0.770                                           | -0.751                                                          | -0.679                          | -0.541                           |
| N(2)  | -0.762                           | -0.750                                            | -0.74                            | -0.748                          | -0.763                          | -0.763                                           | -0.728                                                          | -0.750                          | -0.737                           |
| N(3)  | -0.692                           | -0.771                                            | -0.79                            | -0.747                          | -0.683                          | -0.684                                           | -0.663                                                          | -0.568                          | -0.447                           |
| N(4)  | -0.827                           | -0.803                                            | -0.79                            | -0.806                          | -0.824                          | -0.822                                           | -0.804                                                          | -0.810                          | -0.795                           |
| N(5)  | -0.841                           | -0.726                                            | -0.73                            | -0.744                          | -0.759                          | -0.757                                           | -0.744                                                          | -0.710                          | -0.672                           |
| N(6)  | -0.816                           | -0.723                                            | -0.75                            | -0.721                          | -0.696                          | -0.696                                           | -0.681                                                          | -0.572                          | -0.398                           |
| N(7)  | -0.800                           | -0.765                                            | -0.80                            | -0.777                          | -0.729                          | -0.728                                           | -0.706                                                          | -0.544                          | -0.390                           |
| N(8)  | -0.836                           | -0.779                                            | -0.80                            | -0.783                          | -0.773                          | -0.773                                           | -0.759                                                          | -0.744                          | -0.715                           |
| C(1)  | 0.495                            | 0.442                                             | 0.39                             | 0.469                           | 0.557                           | 0.558                                            | 0.574                                                           | 0.502                           | 0.415                            |
| C(2)  | -0.011                           | -0.015                                            | -0.01                            | -0.014                          | -0.028                          | -0.028                                           | -0.030                                                          | -0.029                          | -0.030                           |
| C(3)  | 0.596                            | 0.604                                             | 0.57                             | 0.601                           | 0.636                           | 0.637                                            | 0.649                                                           | 0.651                           | 0.657                            |
| C(4)  | 0.543                            | 0.582                                             | 0.48                             | 0.551                           | 0.630                           | 0.630                                            | 0.641                                                           | 0.633                           | 0.632                            |
| C(5)  | 0.816                            | 0.856                                             | 0.81                             | 0.859                           | 0.881                           | 0.881                                            | 0.880                                                           | 0.837                           | 0.781                            |
| C(6)  | 0.837                            | 0.852                                             | 0.83                             | 0.868                           | 0.883                           | 0.883                                            | 0.883                                                           | 0.833                           | 0.777                            |
| C(7)  | 0.462                            | 0.423                                             | 0.31                             | 0.413                           | 0.536                           | 0.536                                            | 0.555                                                           | 0.481                           | 0.406                            |
| O(1)  |                                  | -1.164                                            |                                  |                                 | -                               | -1.081                                           | -1.097                                                          |                                 |                                  |
| C     |                                  | 1.658                                             |                                  |                                 | -                               | 2.149                                            | 1.807                                                           |                                 |                                  |
| O(2)  |                                  | -1.163                                            |                                  |                                 | -                               | -1.083                                           | -1.093                                                          |                                 |                                  |

**Table S4b.** B3LYP/6-311G\* QTAIM charges of [NiLH] complexes.

| Atoms | <sup>1</sup> [NiLH] <sup>0</sup> | <sup>1</sup> [NiLH-CO <sub>2</sub> ] <sup>0</sup> | <sup>2</sup> [NiLH] <sup>+</sup> | <sup>2</sup> [NiLH-CO <sub>2</sub> ] <sup>+</sup> | <sup>1</sup> [NiLH] <sup>2+</sup> | CO <sub>2</sub> |
|-------|----------------------------------|---------------------------------------------------|----------------------------------|---------------------------------------------------|-----------------------------------|-----------------|
| Ni    | 0.151                            | 0.675                                             | 0.663                            | 0.890                                             | 0.944                             |                 |
| S(1)  | -0.115                           | -0.099                                            | -0.056                           | -0.034                                            | 0.013                             |                 |
| S(2)  | -0.117                           | -0.065                                            | -0.028                           | 0.0002                                            | 0.056                             |                 |
| N(1)  | -0.676                           | -0.676                                            | -0.681                           | -0.689                                            | -0.675                            |                 |
| N(2)  | -0.660                           | -0.656                                            | -0.669                           | -0.671                                            | -0.665                            |                 |
| N(3)  | -0.664                           | -0.667                                            | -0.678                           | -0.687                                            | -0.673                            |                 |
| N(4)  | -0.681                           | -0.674                                            | -0.666                           | -0.666                                            | -0.664                            |                 |
| N(5)  | -0.683                           | -0.688                                            | -0.683                           | -0.686                                            | -0.657                            |                 |
| N(6)  | -0.664                           | -0.652                                            | -0.655                           | -0.653                                            | -0.644                            |                 |
| N(7)  | -0.658                           | -0.679                                            | -0.684                           | -0.695                                            | -0.683                            |                 |
| N(8)  | -0.684                           | -0.664                                            | -0.663                           | -0.660                                            | -0.650                            |                 |
| C(1)  | 0.319                            | 0.331                                             | 0.315                            | 0.313                                             | 0.303                             |                 |
| C(2)  | -0.017                           | -0.027                                            | -0.019                           | -0.020                                            | -0.020                            |                 |
| C(3)  | 0.278                            | 0.264                                             | 0.303                            | 0.295                                             | 0.268                             |                 |
| C(4)  | 0.594                            | 0.575                                             | 0.529                            | 0.515                                             | 0.484                             |                 |
| C(5)  | 0.328                            | 0.316                                             | 0.311                            | 0.312                                             | 0.311                             |                 |
| C(6)  | 0.270                            | 0.272                                             | 0.273                            | 0.265                                             | 0.241                             |                 |
| C(7)  | 0.585                            | 0.613                                             | 0.529                            | 0.520                                             | 0.496                             |                 |
| O(1)  |                                  | -1.214                                            |                                  | -1.104                                            |                                   | -1.076          |
| C     |                                  | 1.442                                             |                                  | 1.749                                             |                                   | 2.153           |
| O(2)  |                                  | -1.205                                            |                                  | -1.100                                            |                                   | -1.076          |

**Table S5a.** B3LYP/6-311G\* QTAIM BCP characteristics of [NiL] species from QTAIM analysis, i.e., A1-BCP-A2 distance  $d$ , charge density  $\rho$ , Laplacian  $\Delta\rho$ , ellipticity  $\varepsilon$  and delocalization index DI of chosen complexes.

|                                                                 | A1 | A2   | $d$<br>[Å] | $\rho$<br>[e/Å <sup>3</sup> ] | $\Delta\rho$<br>[e/Å <sup>5</sup> ] | $\varepsilon$ | $\lambda_1$<br>[e/Å <sup>5</sup> ] | $\lambda_2$<br>[e/Å <sup>5</sup> ] | $\lambda_3$<br>[e/Å <sup>5</sup> ] | DI   |
|-----------------------------------------------------------------|----|------|------------|-------------------------------|-------------------------------------|---------------|------------------------------------|------------------------------------|------------------------------------|------|
| <sup>3</sup> [NiL] <sup>2-</sup>                                | Ni | N(1) | 1.917      | 0.70                          | 13.20                               | 0.05          | -3.09                              | -2.96                              | 19.25                              | 0.59 |
|                                                                 | Ni | N(3) | 1.869      | 0.79                          | 14.80                               | 0.03          | -3.63                              | -3.53                              | 21.96                              | 0.64 |
|                                                                 | Ni | N(5) | 1.896      | 0.73                          | 13.28                               | 0.03          | -3.24                              | -3.15                              | 19.67                              | 0.58 |
|                                                                 | Ni | N(7) | 1.830      | 0.86                          | 16.32                               | 0.04          | -4.09                              | -3.94                              | 24.35                              | 0.69 |
| <sup>3</sup> [NiL-CO <sub>2</sub> ] <sup>2-</sup>               | Ni | N(1) | 1.991      | 0.59                          | 9.88                                | 0.08          | -2.48                              | -2.29                              | 14.65                              | 0.48 |
|                                                                 | Ni | N(3) | 2.051      | 0.52                          | 8.69                                | 0.08          | -2.15                              | -1.99                              | 12.83                              | 0.42 |
|                                                                 | Ni | N(5) | 1.953      | 0.65                          | 11.20                               | 0.03          | -2.76                              | -2.67                              | 16.63                              | 0.50 |
|                                                                 | Ni | N(7) | 1.957      | 0.66                          | 11.19                               | 0.02          | -2.88                              | -2.83                              | 16.90                              | 0.52 |
|                                                                 | Ni | C    | 2.052      | 0.63                          | 1.86                                | 0.06          | -3.13                              | -2.96                              | 7.95                               | 0.57 |
|                                                                 | C  | O(1) | 1.221      | 2.68                          | -4.33                               | 0.02          | -23.39                             | -23.03                             | 42.09                              | 1.26 |
|                                                                 | C  | O(2) | 1.222      | 2.67                          | -4.32                               | 0.02          | -23.31                             | -22.89                             | 41.88                              | 1.25 |
| <sup>1</sup> [NiL] <sup>2-</sup>                                | Ni | N(1) | 1.919      | 0.70                          | 11.29                               | 0.03          | -3.03                              | -2.93                              | 17.25                              | 0.59 |
|                                                                 | Ni | N(3) | 1.917      | 0.80                          | 12.03                               | 0.04          | -3.76                              | -3.61                              | 19.40                              | 0.65 |
|                                                                 | Ni | N(5) | 1.853      | 0.86                          | 12.23                               | 0.05          | -4.21                              | -4.00                              | 20.44                              | 0.72 |
|                                                                 | Ni | N(7) | 1.874      | 0.80                          | 12.03                               | 0.04          | -3.76                              | -3.61                              | 19.40                              | 0.65 |
| <sup>2</sup> [NiL] <sup>2-</sup>                                | Ni | N(1) | 1.911      | 0.71                          | 11.40                               | 0.03          | -3.13                              | -3.04                              | 17.56                              | 0.60 |
|                                                                 | Ni | N(3) | 1.907      | 0.73                          | 12.18                               | 0.04          | -3.25                              | -3.12                              | 18.55                              | 0.61 |
|                                                                 | Ni | N(5) | 1.851      | 0.85                          | 12.81                               | 0.03          | -4.05                              | -3.95                              | 20.82                              | 0.70 |
|                                                                 | Ni | N(7) | 1.853      | 0.84                          | 12.72                               | 0.03          | -3.98                              | -3.86                              | 20.56                              | 0.68 |
| <sup>1</sup> [NiL] <sup>0</sup>                                 | Ni | N(1) | 1.901      | 0.73                          | 11.66                               | 0.03          | -3.25                              | -3.15                              | 18.06                              | 0.61 |
|                                                                 | Ni | N(3) | 1.910      | 0.72                          | 12.04                               | 0.02          | -3.23                              | -3.16                              | 18.42                              | 0.60 |
|                                                                 | Ni | N(5) | 1.834      | 0.88                          | 13.37                               | 0.03          | -4.24                              | -4.12                              | 21.73                              | 0.69 |
|                                                                 | Ni | N(7) | 1.862      | 0.82                          | 13.01                               | 0.01          | -3.82                              | -3.79                              | 20.62                              | 0.67 |
| <sup>1</sup> [NiL <sub>fr</sub> -CO <sub>2</sub> ] <sup>0</sup> | Ni | N(1) | 1.893      | 0.79                          | 11.28                               | 0.02          | -3.81                              | -3.75                              | 18.84                              | 0.62 |
|                                                                 | Ni | N(3) | 1.959      | 0.67                          | 9.99                                | 0.04          | -3.06                              | -2.96                              | 16.01                              | 0.53 |
|                                                                 | Ni | N(5) | 1.840      | 0.89                          | 12.27                               | 0.06          | -4.45                              | -4.19                              | 20.91                              | 0.67 |
|                                                                 | Ni | N(7) | 1.894      | 0.77                          | 11.19                               | 0.07          | -3.59                              | -3.36                              | 18.13                              | 0.60 |
|                                                                 | Ni | C    | 1.914      | 0.77                          | 3.16                                | 0.02          | -4.01                              | -3.94                              | 11.12                              | 0.47 |
|                                                                 | C  | O(1) | 1.200      | 2.82                          | -3.19                               | 0.00          | -24.84                             | -24.74                             | 46.38                              | 1.29 |
|                                                                 | C  | O(2) | 1.201      | 2.81                          | -3.12                               | 0.01          | -24.76                             | -24.55                             | 46.19                              | 1.28 |
| <sup>2</sup> [NiL] <sup>+</sup>                                 | Ni | N(1) | 1.913      | 0.71                          | 11.43                               | 0.02          | -3.20                              | -3.12                              | 17.75                              | 0.58 |
|                                                                 | Ni | N(3) | 1.836      | 0.88                          | 13.59                               | 0.02          | -4.24                              | -4.14                              | 21.96                              | 0.68 |
|                                                                 | Ni | N(5) | 1.906      | 0.74                          | 11.92                               | 0.02          | -3.33                              | -3.27                              | 18.52                              | 0.60 |
|                                                                 | Ni | N(5) | 1.864      | 0.82                          | 13.13                               | 0.01          | -3.80                              | -3.77                              | 20.70                              | 0.66 |
| <sup>1</sup> [NiL] <sup>2+</sup>                                | Ni | N(1) | 1.919      | 0.70                          | 11.29                               | 0.03          | -3.03                              | -2.93                              | 17.25                              | 0.59 |
|                                                                 | Ni | N(3) | 1.905      | 0.80                          | 12.03                               | 0.04          | -3.76                              | -3.61                              | 19.40                              | 0.65 |
|                                                                 | Ni | N(5) | 1.842      | 0.80                          | 12.03                               | 0.04          | -3.76                              | -3.61                              | 19.40                              | 0.65 |
|                                                                 | Ni | N(7) | 1.872      | 0.86                          | 12.23                               | 0.05          | -4.21                              | -4.00                              | 20.44                              | 0.72 |

**Table S5b.** B3LYP/6-311G\* QTAIM BCP characteristics of [NiLH] species and CO<sub>2</sub> from QTAIM analysis, i.e., A1-BCP-A2 distance  $d$ , charge density  $\rho$ , Laplacian  $\Delta\rho$ , ellipticity  $\varepsilon$  and delocalization index DI of chosen complexes.

|                                                   | A1 | A2   | $d$<br>[Å] | $\rho$<br>[e/Å <sup>3</sup> ] | $\Delta\rho$<br>[e/Å <sup>5</sup> ] | $\varepsilon$ | $\lambda_1$<br>[e/Å <sup>5</sup> ] | $\lambda_2$<br>[e/Å <sup>5</sup> ] | $\lambda_3$<br>[e/Å <sup>5</sup> ] | DI   |
|---------------------------------------------------|----|------|------------|-------------------------------|-------------------------------------|---------------|------------------------------------|------------------------------------|------------------------------------|------|
| <sup>1</sup> [NiLH] <sup>2+</sup>                 | Ni | N(1) | 1.951      | 0.67                          | 10.90                               | 0.11          | -2.90                              | -2.60                              | 16.39                              | 0.56 |
|                                                   | Ni | N(3) | 1.953      | 0.67                          | 10.70                               | 0.07          | -2.91                              | -2.72                              | 16.40                              | 0.57 |
|                                                   | Ni | N(5) | 1.915      | 0.74                          | 11.90                               | 0.08          | -3.36                              | -3.10                              | 17.85                              | 0.61 |
|                                                   | Ni | N(7) | 1.956      | 0.67                          | 10.44                               | 0.074         | -2.89                              | -2.69                              | 16.03                              | 0.57 |
| <sup>2</sup> [NiLH] <sup>+</sup>                  | Ni | N(1) | 2.096      | 0.46                          | 8.37                                | 0.08          | -1.64                              | -1.52                              | 11.53                              | 0.41 |
|                                                   | Ni | N(3) | 2.064      | 0.50                          | 9.16                                | 0.05          | -1.88                              | -1.79                              | 12.83                              | 0.44 |
|                                                   | Ni | N(5) | 2.057      | 0.51                          | 9.34                                | 0.09          | -1.89                              | -1.73                              | 12.97                              | 0.43 |
|                                                   | Ni | N(7) | 2.055      | 0.51                          | 9.48                                | 0.08          | -1.87                              | -1.73                              | 13.09                              | 0.45 |
| <sup>2</sup> [NiLH-CO <sub>2</sub> ] <sup>+</sup> | Ni | N(1) | 2.111      | 0.46                          | 7.51                                | 0.11          | -1.80                              | -1.62                              | 10.94                              | 0.38 |
|                                                   | Ni | N(3) | 2.086      | 0.49                          | 8.10                                | 0.08          | -1.95                              | -1.80                              | 11.85                              | 0.41 |
|                                                   | Ni | N(5) | 2.060      | 0.52                          | 8.69                                | 0.07          | -2.07                              | -1.94                              | 12.70                              | 0.42 |
|                                                   | Ni | N(7) | 2.084      | 0.50                          | 8.20                                | 0.06          | -1.87                              | -1.77                              | 11.84                              | 0.42 |
|                                                   | Ni | C    | 2.079      | 0.59                          | 1.65                                | 0.05          | -2.85                              | -2.71                              | 7.21                               | 0.50 |
|                                                   | C  | O(1) | 1.204      | 2.78                          | -3.35                               | 0.01          | -24.54                             | -24.25                             | 45.44                              | 1.31 |
|                                                   | C  | O(2) | 1.205      | 2.78                          | -3.32                               | 0.01          | -24.54                             | -24.20                             | 45.43                              | 1.30 |
| <sup>1</sup> [NiLH] <sup>0</sup>                  | Ni | N(1) | 2.966      | 0.10                          | 1.16                                | 0.79          | -0.23                              | -0.13                              | 1.52                               | 0.10 |
|                                                   | Ni | N(3) | 1.913      | 0.70                          | 13.40                               | 0.05          | -3.10                              | -2.96                              | 19.46                              | 0.63 |
|                                                   | Ni | N(5) | 2.769      | 0.14                          | 1.64                                | 0.38          | -0.40                              | -0.29                              | 2.33                               | 0.13 |
|                                                   | Ni | N(7) | 1.888      | 0.74                          | 14.12                               | 0.00          | -3.39                              | -3.38                              | 20.88                              | 0.66 |
| <sup>1</sup> [NiLH-CO <sub>2</sub> ] <sup>0</sup> | Ni | N(1) | 3.086      | 0.08                          | 0.93                                | 0.33          | -0.17                              | -0.13                              | 1.23                               | 0.06 |
|                                                   | Ni | N(3) | 2.006      | 0.57                          | 10.16                               | 0.04          | -2.30                              | -2.22                              | 14.68                              | 0.49 |
|                                                   | Ni | N(5) | 2.219      | 0.39                          | 5.16                                | 0.17          | -1.66                              | -1.42                              | 8.24                               | 0.30 |
|                                                   | Ni | N(7) | 2.008      | 0.57                          | 10.03                               | 0.07          | -2.34                              | -2.20                              | 14.56                              | 0.49 |
|                                                   | Ni | C    | 1.888      | 0.93                          | 3.50                                | 0.14          | -5.21                              | -4.56                              | 13.27                              | 0.86 |
|                                                   | C  | O(1) | 1.251      | 2.50                          | -6.96                               | 0.03          | -21.56                             | -20.87                             | 35.46                              | 1.17 |
|                                                   | C  | O(2) | 1.254      | 2.48                          | -6.91                               | 0.03          | -21.22                             | -20.52                             | 34.83                              | 1.17 |
| CO <sub>2</sub>                                   | C  | O(1) | 1.200      | 2.82                          | -3.19                               | 0.00          | -24.84                             | -24.74                             | 46.38                              | 1.29 |
|                                                   | C  | O(2) | 1.201      | 2.82                          | -3.19                               | 0.00          | -24.84                             | -24.74                             | 46.38                              | 1.29 |

**Table S6a.** B3LYP/6-311G\* Mulliken populations of [NiL] species for localized molecular orbitals on the nickel atom for complexes studied.

|                                                                 | s    | d <sub>z2</sub> | d <sub>xz</sub> | d <sub>yz</sub> | d <sub>x<sup>2</sup>-y<sup>2</sup></sub> | d <sub>xy</sub> | Σd+s |
|-----------------------------------------------------------------|------|-----------------|-----------------|-----------------|------------------------------------------|-----------------|------|
| <sup>3</sup> [NiL] <sup>2-</sup> α                              | 0.23 | 0.81            | -               | -               | -                                        | -               | 1.04 |
|                                                                 | -    | -               | 0.21            | 0.43            | 0.24                                     | -               | 0.85 |
|                                                                 | -    | -               | -               | 0.16            | 0.73                                     | -               | 0.99 |
|                                                                 | -    | -               | -               | 0.58            | 0.33                                     | -               | 0.91 |
|                                                                 | -    | -               | -               | -               | -                                        | 0.87            | 0.87 |
| <sup>3</sup> [NiL] <sup>2-</sup> β                              | 0.33 | 0.75            | -               | -               | -                                        | -               | 1.08 |
|                                                                 | -    | -               | 0.62            | 0.27            | -                                        | -               | 0.89 |
|                                                                 | -    | -               | 0.24            | 0.62            | -                                        | -               | 0.86 |
|                                                                 | -    | -               | 0.07            | -               | -                                        | 0.86            | 0.93 |
| <sup>1</sup> [NiL] <sup>2-</sup>                                | 0.21 | 0.84            | -               | -               | -                                        | -               | 1.05 |
|                                                                 | -    | -               | 0.78            | 0.17            | -                                        | -               | 0.97 |
|                                                                 | -    | -               | 0.18            | 0.72            | -                                        | -               | 0.94 |
|                                                                 | -    | -               | -               | -               | -                                        | 0.90            | 0.90 |
| <sup>2</sup> [NiL] <sup>-</sup> α                               | 0.19 | 0.86            | -               | -               | -                                        | -               | 1.05 |
|                                                                 | -    | -               | 0.73            | 0.23            | -                                        | -               | 0.96 |
|                                                                 | -    | -               | 0.21            | 0.71            | -                                        | -               | 0.92 |
|                                                                 | -    | -               | -               | -               | -                                        | 0.94            | 0.94 |
| <sup>2</sup> [NiL] <sup>2-</sup> β                              | 0.19 | 0.86            | -               | -               | -                                        | -               | 1.05 |
|                                                                 | -    | -               | 0.72            | 0.24            | -                                        | -               | 0.96 |
|                                                                 | -    | -               | 0.23            | 0.71            | -                                        | -               | 0.94 |
|                                                                 | -    | -               | -               | -               | -                                        | 0.95            | 0.95 |
| <sup>1</sup> [NiL] <sup>0</sup>                                 | 0.17 | 0.87            | -               | -               | -                                        | -               | 1.04 |
|                                                                 | -    | -               | 0.64            | 0.33            | -                                        | -               | 0.97 |
|                                                                 | -    | -               | 0.31            | 0.62            | -                                        | -               | 0.93 |
|                                                                 | -    | -               | -               | -               | -                                        | 0.95            | 0.95 |
| <sup>1</sup> [NiL] <sup>2+</sup>                                | 0.13 | 0.89            | -               | -               | -                                        | -               | 1.03 |
|                                                                 | -    | -               | 0.92            | -               | -                                        | -               | 0.94 |
|                                                                 | -    | -               | 0.00            | 0.92            | -                                        | -               | 0.95 |
|                                                                 | -    | -               | -               | -               | -                                        | 0.93            | 0.96 |
| <sup>2</sup> [NiL] <sup>+</sup> α                               | 0.15 | 0.88            | -               | -               | -                                        | -               | 1.03 |
|                                                                 | -    | 0.59            | 0.33            | -               | -                                        | -               | 0.93 |
|                                                                 | -    | -               | 0.35            | 0.61            | -                                        | -               | 0.97 |
|                                                                 | -    | -               | -               | -               | -                                        | 0.95            | 0.96 |
| <sup>2</sup> [NiL] <sup>+</sup> β                               | 0.15 | 0.88            | -               | -               | -                                        | -               | 1.03 |
|                                                                 | -    | -               | -               | 0.94            | -                                        | -               | 0.94 |
|                                                                 | -    | -               | 0.94            | -               | -                                        | -               | 0.94 |
|                                                                 | -    | -               | -               | -               | -                                        | 0.95            | 0.95 |
| <sup>1</sup> [NiL-CO <sub>2</sub> ] <sup>0</sup>                | 0.17 | 0.87            | -               | -               | -                                        | -               | 1.04 |
|                                                                 | -    | -               | 0.64            | 0.33            | -                                        | -               | 0.97 |
|                                                                 | -    | -               | 0.31            | 0.62            | -                                        | -               | 0.93 |
|                                                                 | -    | -               | -               | -               | -                                        | 0.95            | 0.95 |
| <sup>1</sup> [NiL <sub>fr</sub> -CO <sub>2</sub> ] <sup>0</sup> | -    | -               | 0.84            | 0.11            | -                                        | -               | 0.95 |
|                                                                 | -    | -               | 0.12            | 0.86            | -                                        | -               | 0.98 |
|                                                                 | -    | -               | -               | -               | -                                        | 0.96            | 0.96 |
| <sup>3</sup> [NiL-CO <sub>2</sub> ] <sup>2-</sup> α             | -    | 0.74            | -               | -               | -                                        | -               | 0.93 |
|                                                                 | -    | -               | 0.48            | 0.4             | -                                        | -               | 0.88 |
|                                                                 | -    | -               | 0.43            | 0.54            | -                                        | -               | 0.97 |
|                                                                 | -    | -               | -               | -               | 0.92                                     | -               | 0.92 |
|                                                                 | -    | -               | -               | -               | -                                        | 0.93            | 0.74 |
| <sup>3</sup> [NiL-CO <sub>2</sub> ] <sup>2-</sup> β             | -    | -               | 0.51            | 0.46            | -                                        | -               | 0.97 |
|                                                                 | -    | -               | 0.44            | 0.49            | -                                        | -               | 0.93 |
|                                                                 | -    | -               | -               | -               | -                                        | 0.94            | 0.94 |



**Table S6b.** B3LYP/6-311G\* Mulliken populations of [NiLH] species for localized molecular orbitals on the nickel atom for complexes studied.

|                                                     | s                    | d <sub>z2</sub>      | d <sub>xz</sub>              | d <sub>yz</sub>              | d <sub>x<sup>2</sup>-y<sup>2</sup></sub> | d <sub>xy</sub>      | Σd+s                                 |
|-----------------------------------------------------|----------------------|----------------------|------------------------------|------------------------------|------------------------------------------|----------------------|--------------------------------------|
| <sup>1</sup> [NiLH] <sup>2+</sup> α                 | 0.16                 | 0.87<br>0.01         | 0.01<br>0.93<br>0.03<br>0.01 | 0.03<br>0.71<br>0.23         | 0.41                                     | 0.23<br>0.73         | 1.06<br>0.97<br>0.97<br>0.96         |
| <sup>1</sup> [NiLH] <sup>2+</sup> β                 | 0.19                 | 0.87                 | 0.94<br>0.02                 | 0.03<br>0.22<br>0.72         |                                          | 0.74<br>0.22         | 1.06<br>0.97<br>0.96<br>0.97         |
| <sup>2</sup> [NiLH] <sup>+</sup> α                  | 0.23                 | 0.81<br>0.03         | 0.03<br>0.84<br>0.09         | 0.01<br>0.05<br>0.65<br>0.25 | 0.98<br>0.01                             | 0.06<br>0.29<br>0.60 | 1.07<br>1.00<br>0.96<br>0.96<br>0.95 |
| <sup>2</sup> [NiLH] <sup>+</sup> β                  | 0.35                 | 0.74<br>0.03         | 0.03<br>0.81<br>0.11         | 0.07<br>0.58<br>0.30         |                                          | 0.06<br>0.36<br>0.53 | 1.12<br>0.96<br>0.95<br>0.94         |
| <sup>2</sup> [NiLH-CO <sub>2</sub> ] <sup>+</sup> α | 0.09                 | 0.01<br>0.02<br>0.82 | 0.46<br>0.50                 | 0.49<br>0.46<br>0.01         | 1.00                                     | 0.94<br>0.02         | 1.00<br>0.98<br>0.96<br>0.97<br>0.93 |
| <sup>2</sup> [NiLH-CO <sub>2</sub> ] <sup>+</sup> β |                      |                      | 0.49<br>0.47                 | 0.47<br>0.49                 |                                          | 0.95                 | 0.97<br>0.96<br>0.96                 |
| <sup>1</sup> [NiLH] <sup>0</sup>                    | 0.60<br>0.02<br>0.02 | 0.45<br>0.08<br>0.24 | 0.02<br>0.22<br>0.66<br>0.02 | 0.03<br>0.54<br>0.36         | 0.08<br>0.02<br>0.29<br>0.30             | 0.68<br>0.22         | 1.15<br>0.91<br>0.93<br>0.94<br>0.94 |
| <sup>1</sup> [NiLH-CO <sub>2</sub> ] <sup>0</sup>   | 0.16<br>0.05         | 0.10<br>0.07<br>0.09 | 0.73<br>0.15                 | 0.22<br>0.12<br>0.55         | 0.55<br>0.16                             | 0.04<br>0.89         | 1.03<br>0.96<br>0.95<br>0.94         |

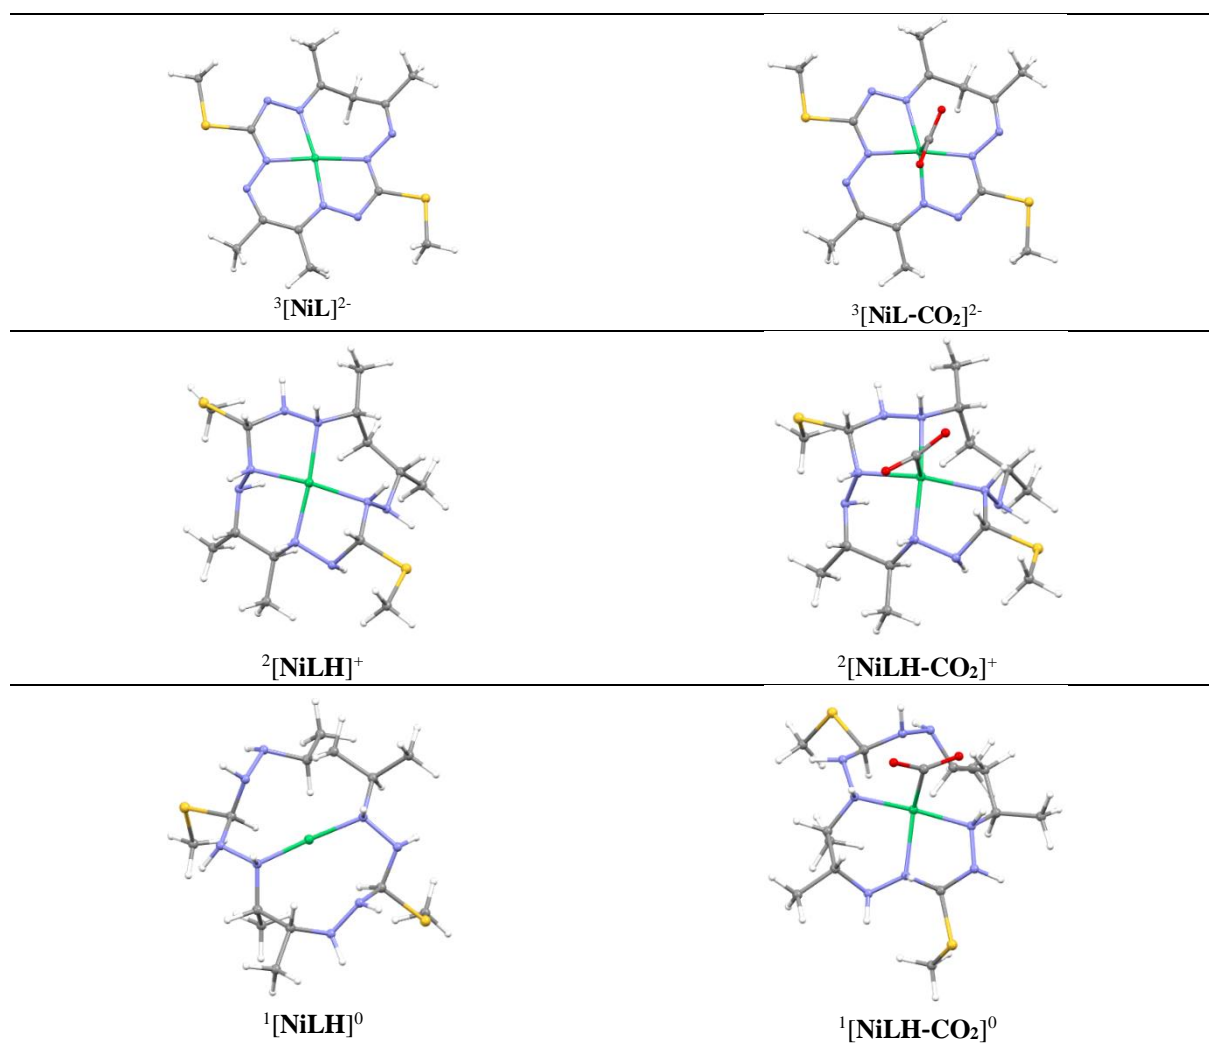

**Figure S1.** Comparison of geometries of complexes studied without (left column) and with CO<sub>2</sub> (right column).

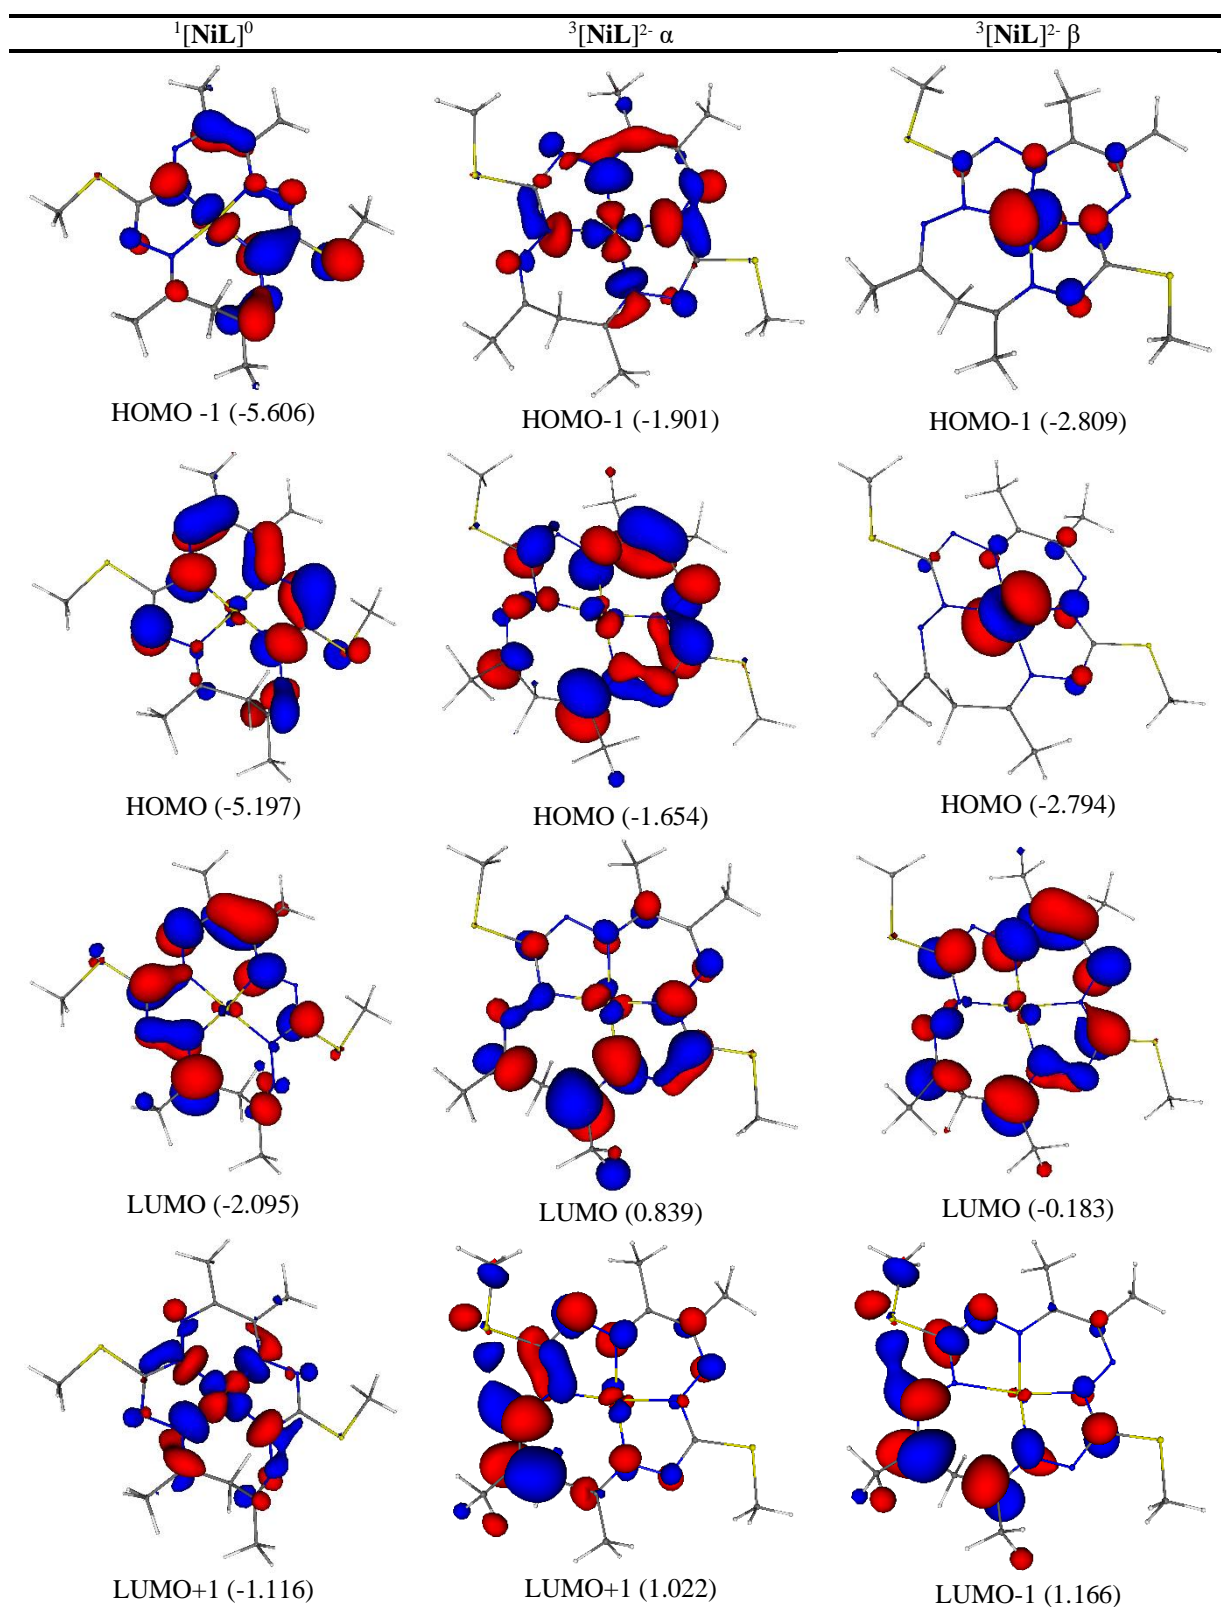

**Figure S2a.** Frontier orbitals of  $^1[\text{NiL}]^0$  and  $^3[\text{NiL}]^{2-}$  (eigenvalues are shown in parentheses in eV), isosurface value is 0.04 e bohr<sup>-3</sup>.

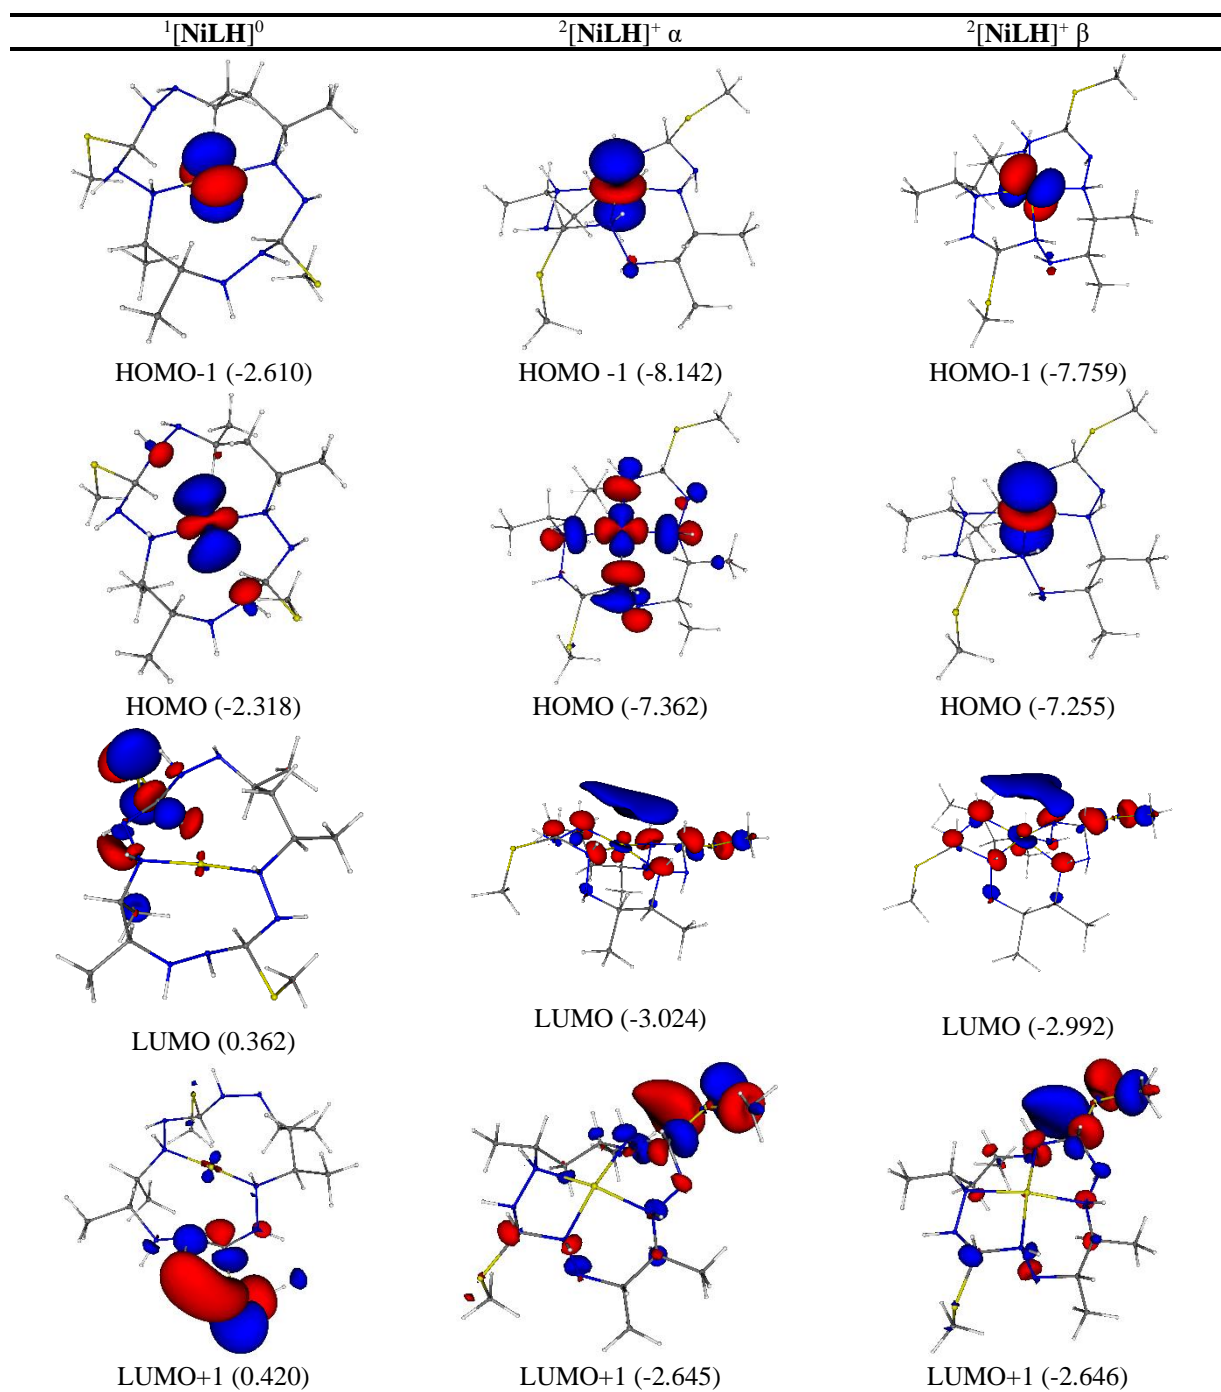

**Figure S2b.** Frontier orbitals of  $^1[\text{NiLH}]^0$  and  $^2[\text{NiLH}]^+$  (eigenvalues are shown in parentheses in eV), isosurface value is  $0.04 \text{ e bohr}^{-3}$ .

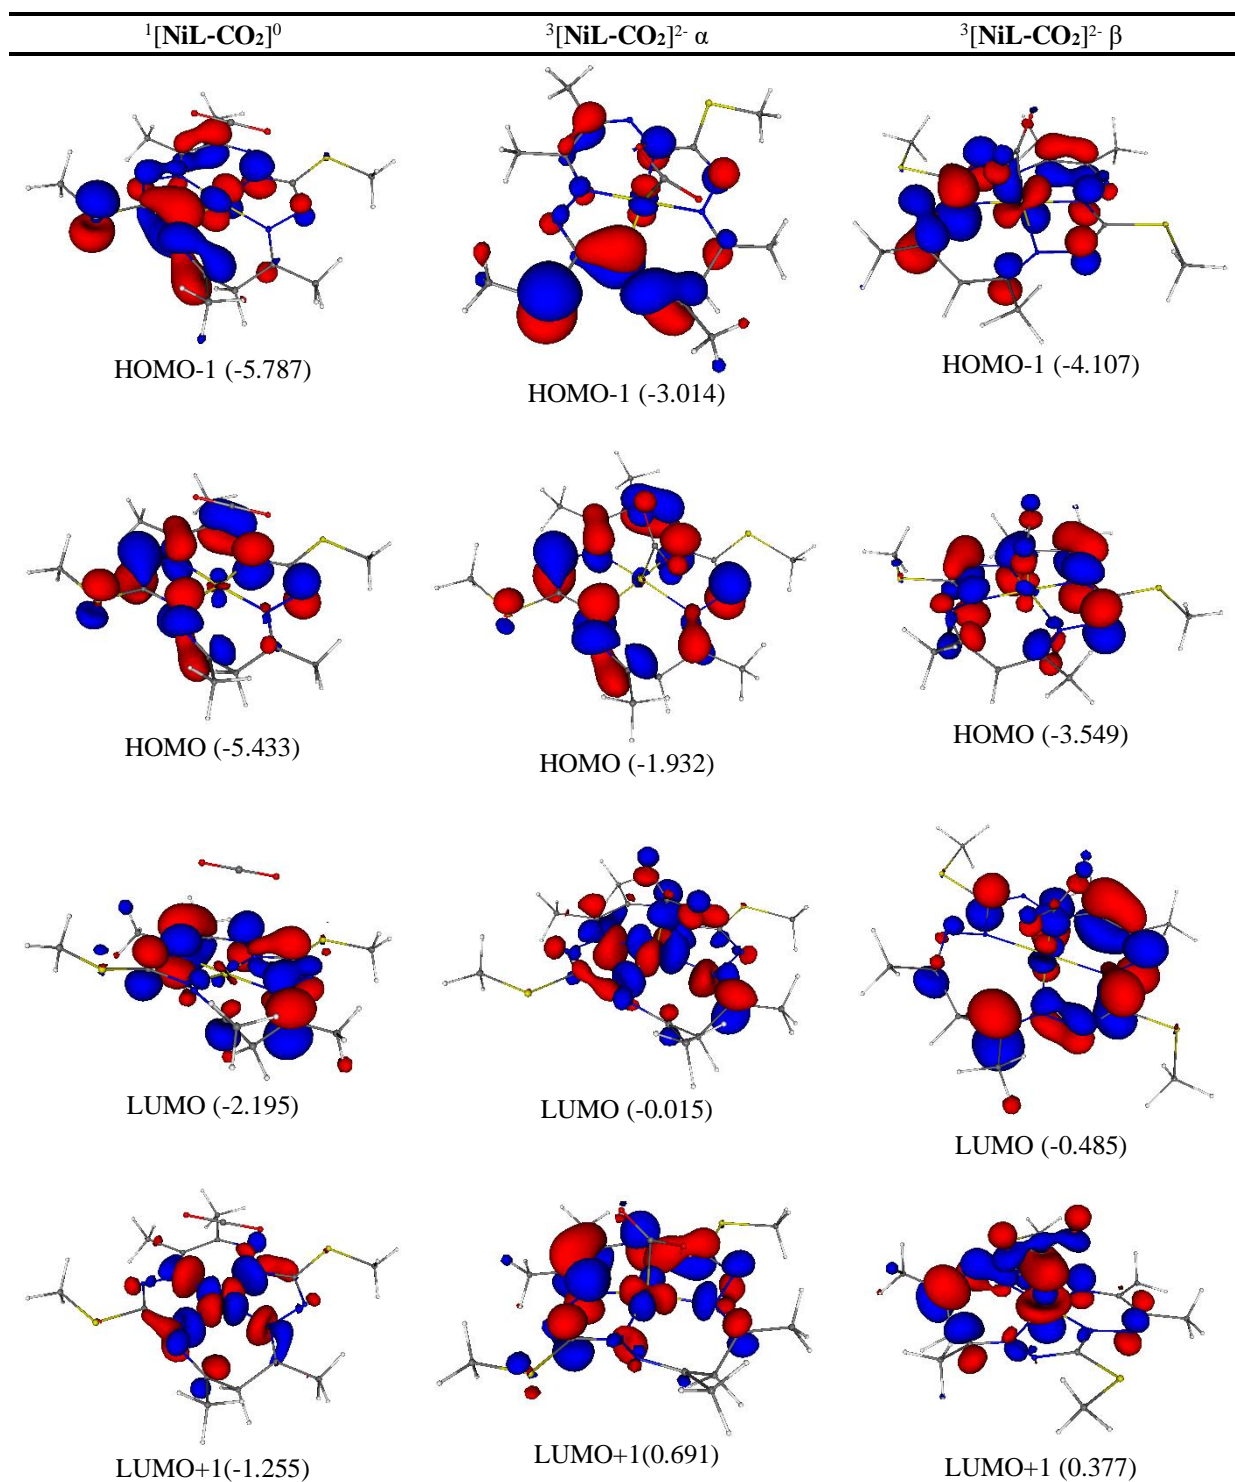

**Figure S3a.** Frontier orbitals of  $^1[\text{NiL-CO}_2]^0$  and  $^3[\text{NiL-CO}_2]^{2-}$  (eigenvalues are shown in parentheses in eV), isosurface value is  $0.04 \text{ e bohr}^{-3}$ .

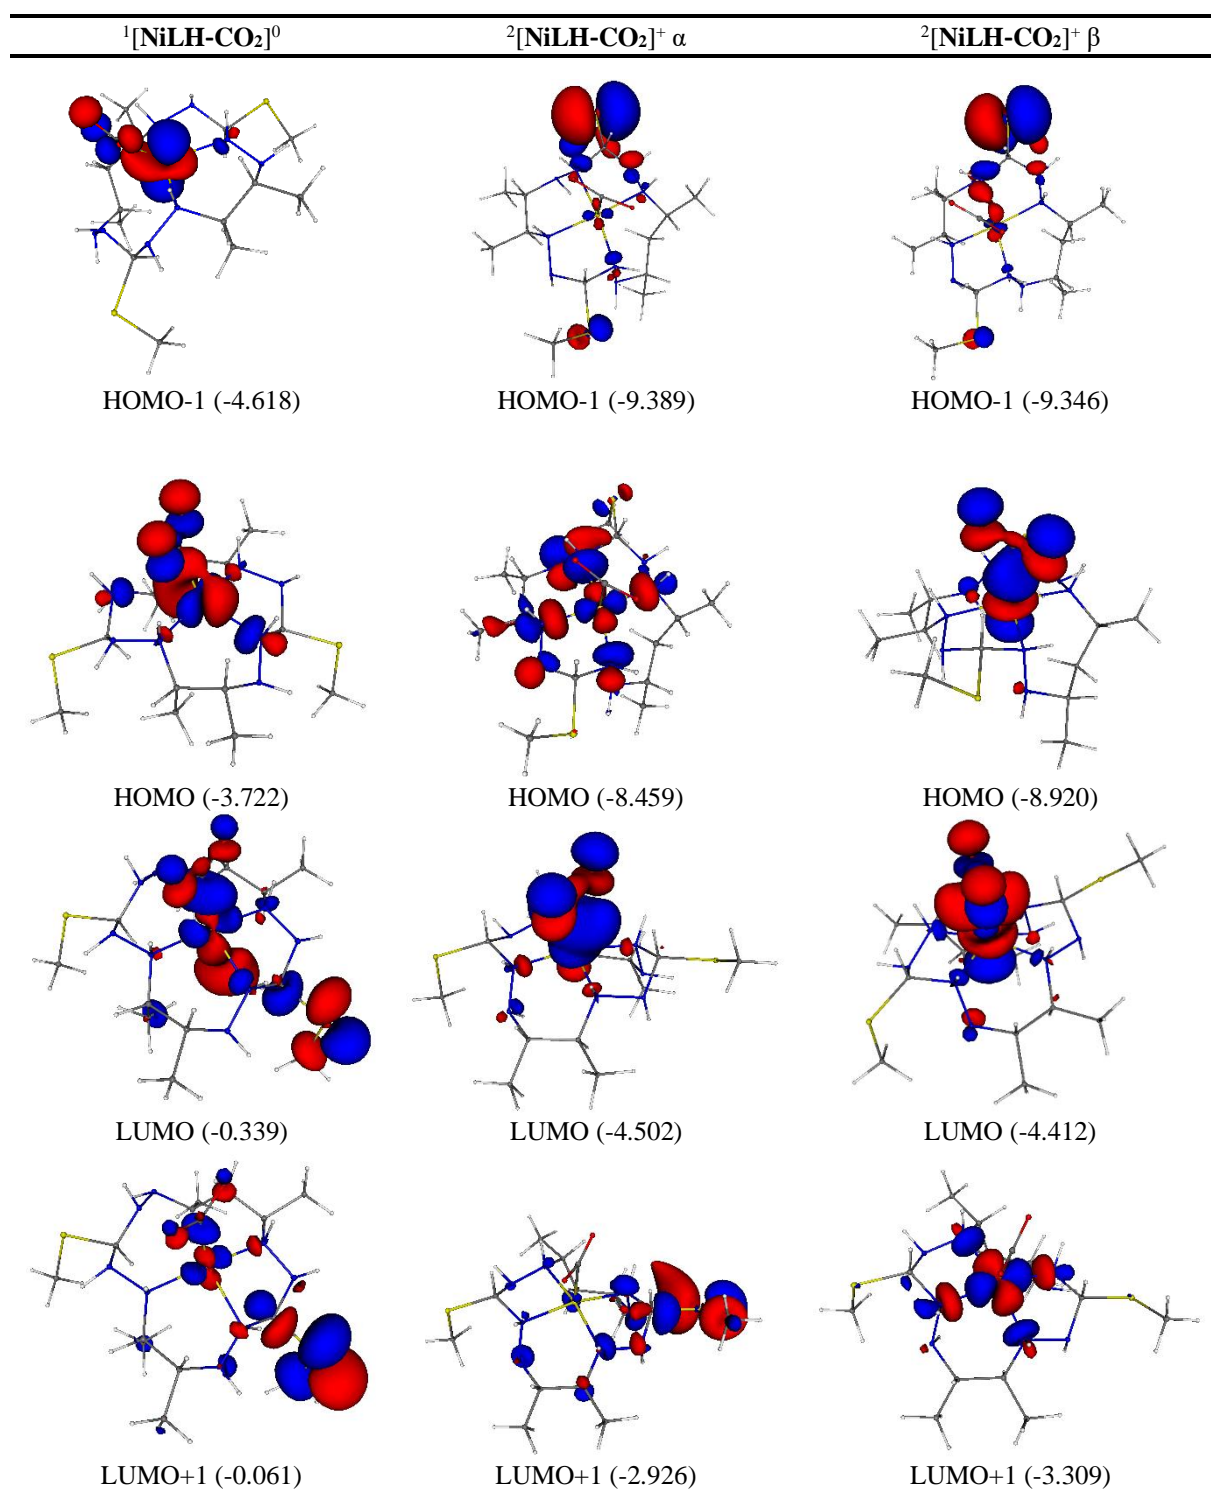

**Figure S3b.** Frontier orbitals of  $^1[\text{NiLH-CO}_2]^0$  and  $^2[\text{NiLH-CO}_2]^+$  (eigenvalues are shown in parentheses in eV), isosurface value is 0.04 e bohr<sup>-3</sup>.
